# Supplementary material
Source: Springer Nature journal article supplement (https://www.springermedizin.de/resource/supplementary/12879_2012_1975_MOESM2_ESM.pdf/9443502)
Supplement: MOESM2 [file 9443502]

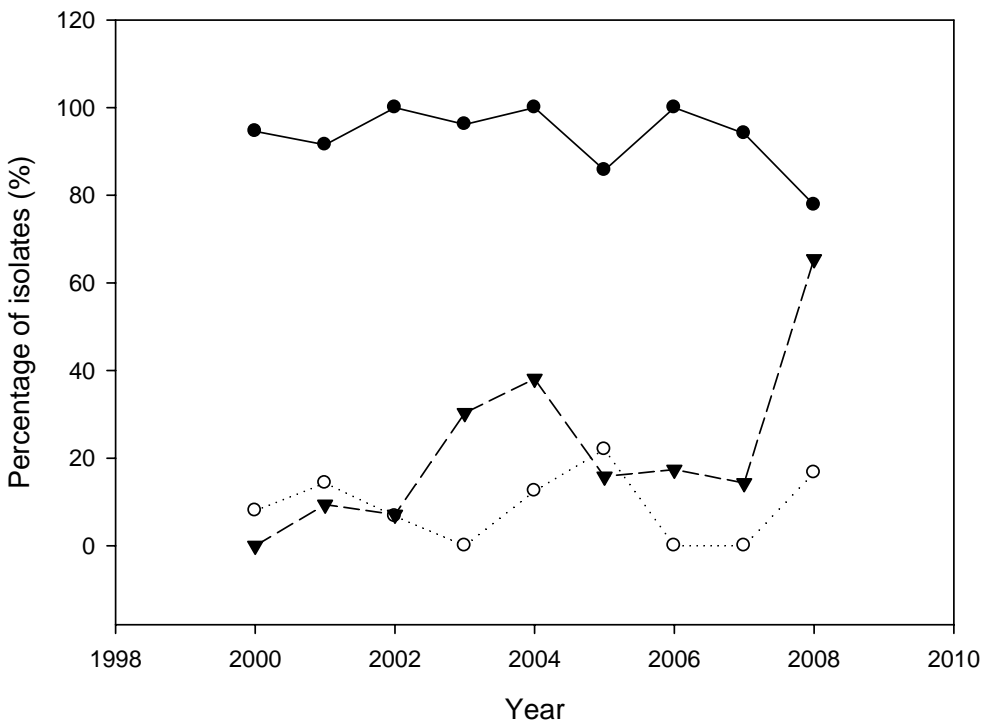

- Methicillin-resistant *S. aureus* (mean 94.9%,  $p=0.414$ )
- Imipenem-resistant *P. aeruginosa* (mean 8.8%,  $p=0.812$ )
- ▼— Imipenem-resistant *A. baumannii* (mean 22.2%,  $p<0.001$ )
